# Supplementary material for: Green photocatalytic organic transformations by polyoxometalates vs. mesoporous TiO2 nanoparticles: selective aerobic oxidation of alcohols
Source: Royal Society of Chemistry journal article supplement (doi:10.1039/c4pp00268g), 2014-10-14

## SUPPORTING INFORMATION

### Green photocatalytic organic transformations by polyoxometalates vs mesoporous TiO<sub>2</sub> nanoparticles: Selective aerobic oxidation of alcohols

Theodoros S. Symeonidis,<sup>a</sup> Ioannis Tamiolakis,<sup>b</sup> Gerasimos S. Armatas,<sup>b</sup> and Ioannis N.  
Lykakis,<sup>a,\*</sup>

<sup>a</sup>Department of Chemistry, Aristotle University of Thessaloniki, University Campus, 54124,  
Thessaloniki, Greece; Tel: +30-2310-997871; Fax: +30-2310-997679; E-mail:  
lykakis@chem.auth.gr.

<sup>b</sup>Department of Materials Science and Technology, University of Crete, 71003 Heraklion, Crete,  
Greece.

#### Table of contents

| Page  |                                                                                  |
|-------|----------------------------------------------------------------------------------|
| 2-3   | DT-MTA catalyst characterization spectra                                         |
| 4-5   | Reaction kinetic studies                                                         |
| 6     | Catalyst recycling tests                                                         |
| 7     | DT-MTA and TBADT catalyzed photooxidation of alcohols <b>3</b> , <b>6-8</b>      |
| 8-11  | Synthetic procedures and spectroscopic data of alcohols <b>1-8</b>               |
| 12-16 | Copies of <sup>1</sup> H and <sup>13</sup> C NMR spectra                         |
| 17-21 | Copies of <sup>1</sup> H NMR spectra of the crude mixture of the photooxidations |
| 22-25 | Copies of MS                                                                     |

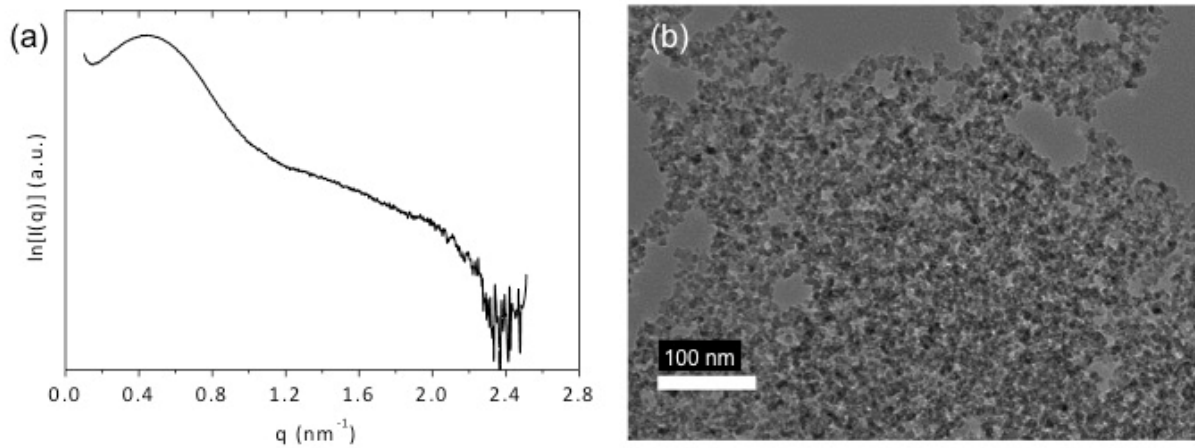

**Fig. S1** (a) Small-angle X-ray scattering pattern and (b) typical TEM image of mesoporous DT-MTA catalyst, showing three-dimensional porous ensembles of uniform  $\text{TiO}_2$  nanoparticles (*ca.* 7–8 nm in size). The SAXS pattern display a strong scattering peak at  $q \sim 0.44 \text{ nm}^{-1}$  which corresponds to an average center-to-center interparticle distance ( $d=2\pi/q$ ) of about 14.3 nm.

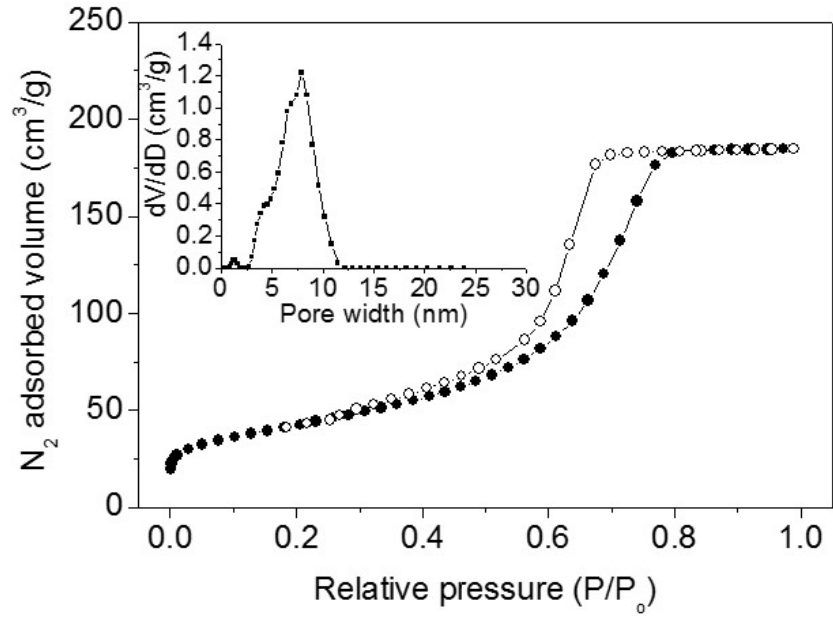

**Fig. S2** Nitrogen adsorption-desorption isotherms at -196 °C and NLDFT pore size distribution calculated from the adsorption data (inset) for mesoporous DT-MTA material.

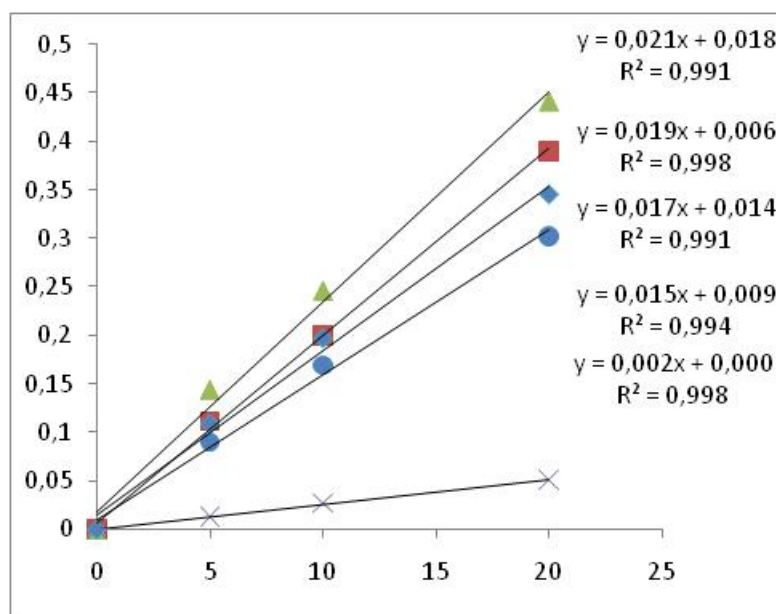

**Fig. S3** The pseudo first-order rate plots ( $x$  is conversion of substrate at time  $t$ ) for the photo-oxidation of various *para*-substituted benzyl alcohols catalyzed by mesoporous DT-MTA.

*Experimental conditions:* 0.1 mmol alcohol, 45 mg catalyst, 20 mL min<sup>-1</sup>O<sub>2</sub>, 3 mL CH<sub>3</sub>CN, 5 °C, UV-visible-light irradiation ( $\lambda > 320$  nm)

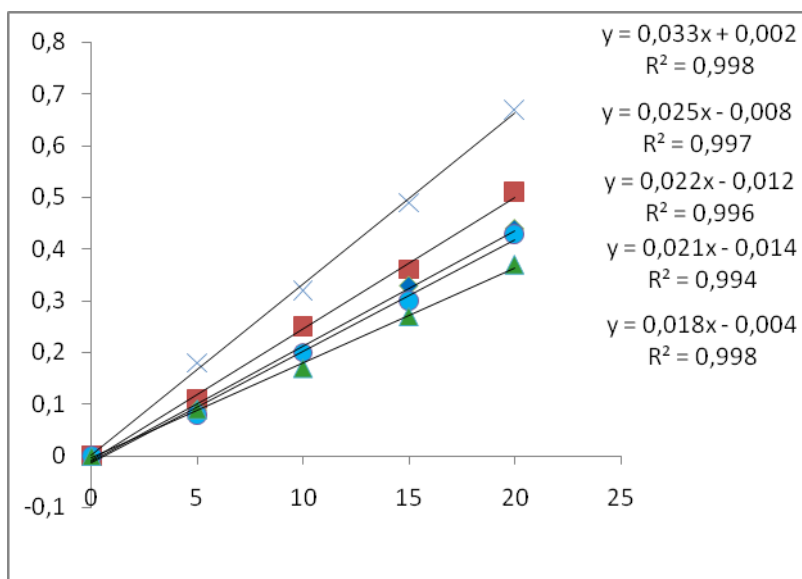

**Fig. S4** The pseudo first-order rate plots ( $x$  is conversion of substrate at time  $t$ ) for the photo-oxidation of various *para*-substituted benzyl alcohols catalyzed by decatungstate. *Experimental conditions*: 0.1 mmol alcohol, 3 mg catalyst, 20 mL min<sup>-1</sup>O<sub>2</sub>, 3 mL CH<sub>3</sub>CN, 5 °C, UV-visible-light irradiation ( $\lambda > 320$  nm).

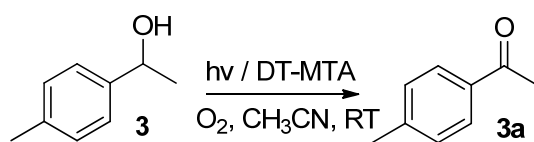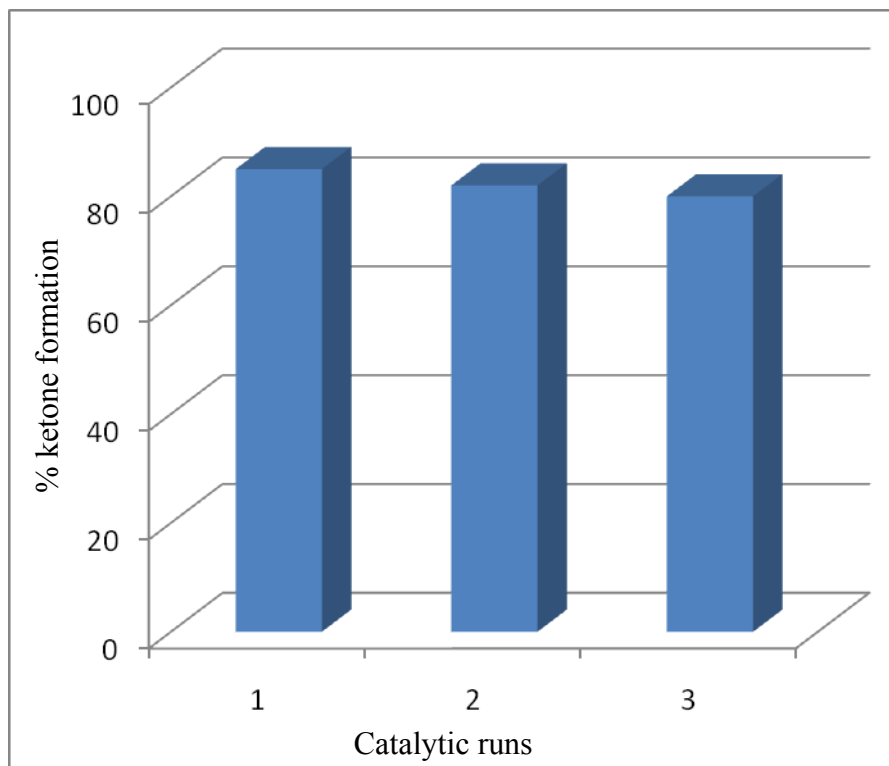

**Fig. S5.** Recycling study of the mesoporous DT-MTA catalyst (*Experimental conditions: 0.1 mmol of 3, 45 mg of catalyst, 3 mL of CH<sub>3</sub>CN, bubbling with O<sub>2</sub>, room temperature, t= 2h*).

**Table S1.** DT-MTA and TBADT catalyzed photooxidation of the *para*-alkyl substitute 1-phenylethanols **3**, **6-8**.

Reaction scheme:  $\text{R}^1\text{-C}_6\text{H}_4\text{-CH(OH)CH}_3 \xrightarrow[\text{O}_2/\text{CH}_3\text{CN}]{\text{hv/catalyst}} \text{R}^1\text{-C}_6\text{H}_4\text{-C(=O)CH}_3 + \text{R}^1\text{-C}_6\text{H}_4\text{-CH(OH)CH}_2\text{OOH}$

| R <sup>1</sup>  | R <sup>2</sup>  |          |
|-----------------|-----------------|----------|
| H               | H               | <b>3</b> |
| CH <sub>3</sub> | H               | <b>6</b> |
| CH <sub>3</sub> | CH <sub>3</sub> | <b>7</b> |
| Ph              | H               | <b>8</b> |

| Sub.     | Catalyst | Time (min) | Conversion % <sup>[a]</sup> | Relative product yield % <sup>[b]</sup> |   |    |                  |
|----------|----------|------------|-----------------------------|-----------------------------------------|---|----|------------------|
|          |          |            |                             | a                                       | b | c  | d                |
| <b>3</b> | TBADT    | 40         | 50                          | >99                                     | - | -  | -                |
| <b>3</b> | TBADT    | 90         | 82                          | >99                                     | - | -  | -                |
| <b>3</b> | TBADT    | 120        | 97                          | >99                                     | - | -  | -                |
| <b>3</b> | DT-MTA   | 90         | 35                          | >99                                     | - | -  | -                |
| <b>6</b> | TBADT    | 10         | 45                          | 88                                      | 4 | 2  | 6                |
| <b>6</b> | TBADT    | 20         | 78                          | 71                                      | 5 | 10 | 14               |
| <b>6</b> | TBADT    | 120        | 100                         | 25                                      | 1 | 2  | 72               |
| <b>6</b> | DT-MTA   | 90         | 41                          | 90                                      | 7 | -  | 3                |
| <b>7</b> | TBADT    | 10         | 10                          | >99                                     | - | -  | -                |
| <b>7</b> | TBADT    | 20         | 55                          | 85                                      | - | 13 | 2                |
| <b>7</b> | DT-MTA   | 90         | 51                          | 91                                      | 2 | 4  | 3                |
| <b>8</b> | TBADT    | 20         | 60                          | 83                                      | 7 | 5  | 5                |
| <b>8</b> | TBADT    | 60         | 80                          | 80                                      | 8 | 6  | 6                |
| <b>8</b> | DT-MTA   | 90         | 35                          | 92                                      | - | -  | 2 <sup>[c]</sup> |

[a] Alcohol (0.1 mmol), decatungstate ( $5 \times 10^{-4}$  M), 2 mL CH<sub>3</sub>CN, at 5 °C. [b] Determined by <sup>1</sup>H NMR spectroscopy and GC-MS after reduction of hydroperoxides to the corresponding alcohols with PPh<sub>3</sub>, error  $\pm$  1%. [c] 6% of the corresponding 4-(1-hydroxyethyl) benzophenone was observed by NMR.

## Synthetic procedures and spectroscopic data of alcohols 1-8

Alcohols **1-5** are commercial available and used without any further purification.

**1-(4-ethylphenyl)ethanol (6)**. This compound was prepared by Grignard reaction using 0.62 g (5.0 mmol) of 4-ethylbenzaldehyde, 0.17 g (7.0 mmol) Mg and 7.0 mmol of MeI in dry ether under Ar atmosphere at 0 °C. 0.71 g of the corresponding aryl alcohol **6** was isolated (94 % yield), after reaction completion monitored by TLC.

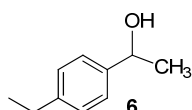

$^1\text{H}$  NMR (500 MHz,  $\text{CDCl}_3$ ):  $\delta$  7.33 (d, 2H,  $J = 8.2$  Hz), 7.22 (d, 2H,  $J = 8.2$  Hz), 4.89 (q, 1H,  $J = 6.5$  Hz), 2.68 (q, 2H,  $J = 7.4$  Hz), 1.93 (s, OH), 1.52 (d, 3H,  $J = 6.4$  Hz), 1.27 (t, 3H,  $J = 7.4$  Hz);  $^{13}\text{C}$  NMR (125 MHz,  $\text{CDCl}_3$ ):  $\delta$  143.5, 143.1, 127.9, 125.3, 70.2, 28.5, 25.0, 15.6. MS  $m/z =$  150, 135 (100), 91, 79.

**1-(4-isopropylphenyl)ethanol (7)**. This compound was prepared by Grignard reaction using 0.7 g (5.0 mmol) of 4-isopropylbenzaldehyde, 0.17 g (7.0 mmol) Mg and 7.0 mmol of MeI in dry ether under Argon atmosphere at 0 °C. 0.75 g of the corresponding aryl alcohol **7** was isolated (91 % yield) after reaction completion monitored by TLC.

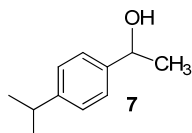

$^1\text{H}$ -NMR (500 MHz,  $\text{CDCl}_3$ ):  $\delta$  7.35 (d, 2H,  $J = 8.1$  Hz), 7.25 (d, 2H,  $J = 8.0$  Hz), 4.89 (q, 1H,  $J = 6.5$  Hz), 2.95 (m, 1H), 2.05 (s, OH), 1.52 (d, 3H,  $J = 6.4$  Hz), 1.29 (t, 3H,  $J = 6.9$  Hz).  $^{13}\text{C}$ -NMR (125 MHz,  $\text{CDCl}_3$ ):  $\delta$  148.1, 143.2, 126.5, 125.4, 70.2, 33.7, 24.9, 23.9. MS  $m/z =$  164, 149 (100), 121, 105, 79.

**1-(4-benzylphenyl)ethanol (8)**. This compound was prepared according to the procedure described below:

**1-(4-benzylphenyl)ethanone (8a)**. To a solution of 5 mmol of diphenyl methane in anhydrous dichloromethane, at 0 °C, were added 6 mmol  $\text{CH}_3\text{COCl}$  and 6 mmol of the  $\text{AlCl}_3$  in portions. The reaction mixture was stirred for 6 h and then 30 ml of 10 % HCl at 0 °C was added and the organic layer was extracted with diethylether, washed with 5 %  $\text{NaHCO}_3$  and



brine, dried and the solvent was removed under evaporation to give the corresponding aryl ketone **8a** in 90 % isolated yield.

To a mixture of  $\text{LiAlH}_4$  (2 mmol) in dry ether 20 mL under Argon atmosphere at 0 °C was added dropwise a solution of the aryl ketone **8a** (6 mmol) in dry ether (10 mL). The mixture was heated under reflux for 1 h. The reaction was quenched at 0 °C by addition of 0.1 mL  $\text{H}_2\text{O}$ , 0.1 mL of 15 % NaOH, and 0.3 mL  $\text{H}_2\text{O}$ , followed by filtration. The mixture was washed with 5 %  $\text{NaHCO}_3$  and brine, dried and the solvent was removed by evaporation to give the corresponding alcohol **8** in 92 % isolated yield.

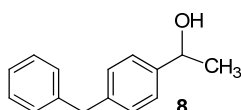

$^1\text{H-NMR}$  (500 MHz,  $\text{CDCl}_3$ ):  $\delta$  7.28 (m, 5H), 7.19 (m, 4H), 4.89 (q, 1H,  $J = 6.4$  Hz), 3.97 (s, 2H), 1.74 (s, OH), 1.48 (d, 3H,  $J = 6.4$  Hz).  $^{13}\text{C-NMR}$  (125 MHz,  $\text{CDCl}_3$ ):  $\delta$  143.5, 141.0, 140.3, 129.0, 128.8, 128.4, 126.1, 125.5, 70.2, 41.6, 25.0. MS  $m/z =$  212, 194, 179, 165, 152, 115, 91 (100), 65.

#### 1-(4-ethylphenyl)ethanone (**6a**)

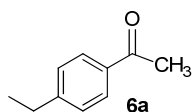

$^1\text{H-NMR}$  (500 MHz,  $\text{CDCl}_3$ ):  $\delta$  7.91 (d, 2H,  $J = 8.8$  Hz), 7.32 (d, 2H,  $J = 8.8$  Hz), 2.74 (q, 2H,  $J = 7.6$  Hz), 2.61 (s, 3H), 1.28 (t, 3H,  $J = 7.6$  Hz). MS  $m/z =$  148, 133 (100), 105, 77.

#### 1-(4-acetylphenyl)-1-ethanone (**6d**)

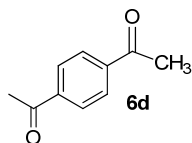

$^1\text{H NMR}$  (500 MHz,  $\text{CDCl}_3$ ):  $\delta$  8.06 (s, 4H), 2.67 (s, 6H). MS  $m/z =$  148, 133 (100), 119, 105, 91.

#### 1-[4-(hydroperoxyethyl) phenyl]-1-ethanone (**6c**)

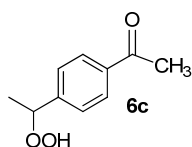

$^1\text{H}$  NMR (500 MHz,  $\text{CDCl}_3$ ):  $\delta$  8.01 (d, 2H,  $J = 8.8$  Hz), 7.88 (s, OOH), 7.32 (d, 2H,  $J = 8.8$  Hz), 5.17 (q, 1H,  $J = 6.6$  Hz), 2.63 (s, 3H), 1.50 (d, 3H,  $J = 6.6$  Hz).

**1-[4-(hydroperoxyethyl)phenyl]-1-ethanol (6b)**

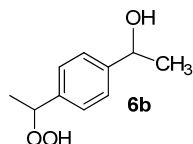

$^1\text{H}$  NMR (500 MHz,  $\text{CDCl}_3$ ):  $\delta$  7.43 (d, 2H,  $J = 8.0$  Hz), 7.39 (d, 2H,  $J = 8.0$  Hz), 4.99 (q, 1H,  $J = 6.6$  Hz), 4.95 (q, 1H,  $J = 6.6$  Hz), 1.53 (d, 3H,  $J = 6.6$  Hz), 1.50 (d, 3H,  $J = 6.6$  Hz).

**1-(4-isopropylphenyl)ethanone (7a)**

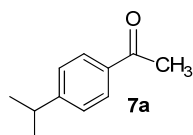

$^1\text{H}$  NMR (500 MHz,  $\text{CDCl}_3$ ):  $\delta$  7.93 (d, 2H,  $J = 8.1$  Hz), 7.34 (d, 2H,  $J = 8.1$  Hz), 2.99 (m, 1H), 2.61 (s, 3H), 1.30 (d, 3H,  $J = 6.9$  Hz). MS  $m/z = 162, 147$  (100), 132, 119, 91, 77.

**1-[4-(hydroperoxy-1-methylethyl)phenyl]-1-ethanone (7c)**

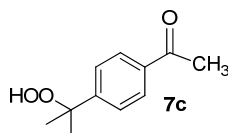

$^1\text{H}$  NMR (500 MHz,  $\text{CDCl}_3$ ):  $\delta$  8.06 (s, OOH), 7.96 (d, 2H,  $J = 8.4$  Hz), 7.60 (d, 2H,  $J = 8.4$  Hz), 2.62 (s, 3H), 1.63 (s, 6H).

**4-benzyl acetophenone (8a)**

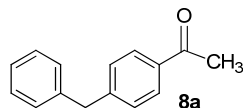

$^1\text{H}$  NMR (500 MHz,  $\text{CDCl}_3$ ):  $\delta$  7.91 (d, 2H,  $J = 8.1$  Hz), 7.31 (m, 4H), 7.25 (t, 1H,  $J = 7.1$  Hz), 7.20 (d, 2H,  $J = 7.4$  Hz), 4.06 (s, 2H), 2.60 (s, 3H). MS  $m/z = 210, 195$  (100), 165, 152, 115, 97.

**1-(4-benzoylphenyl)-1-ethanol (8c)**

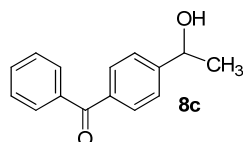

$^1\text{H}$  NMR (500 MHz,  $\text{CDCl}_3$ ):  $\delta$  8.09 (d, 2H,  $J = 8.3$  Hz), 7.89 (d, 2H,  $J = 8.3$  Hz), 7.83 (d, 2H,  $J = 7.8$  Hz), 7.65 (t, 1H,  $J = 7.3$  Hz), 7.54 (t, 2H,  $J = 7.3$  Hz), 2.70 (s, 3H). MS  $m/z = 226, 211, 183, 149, 105$  (100), 77.

$^1\text{H}$  and  $^{13}\text{C}$  NMR spectra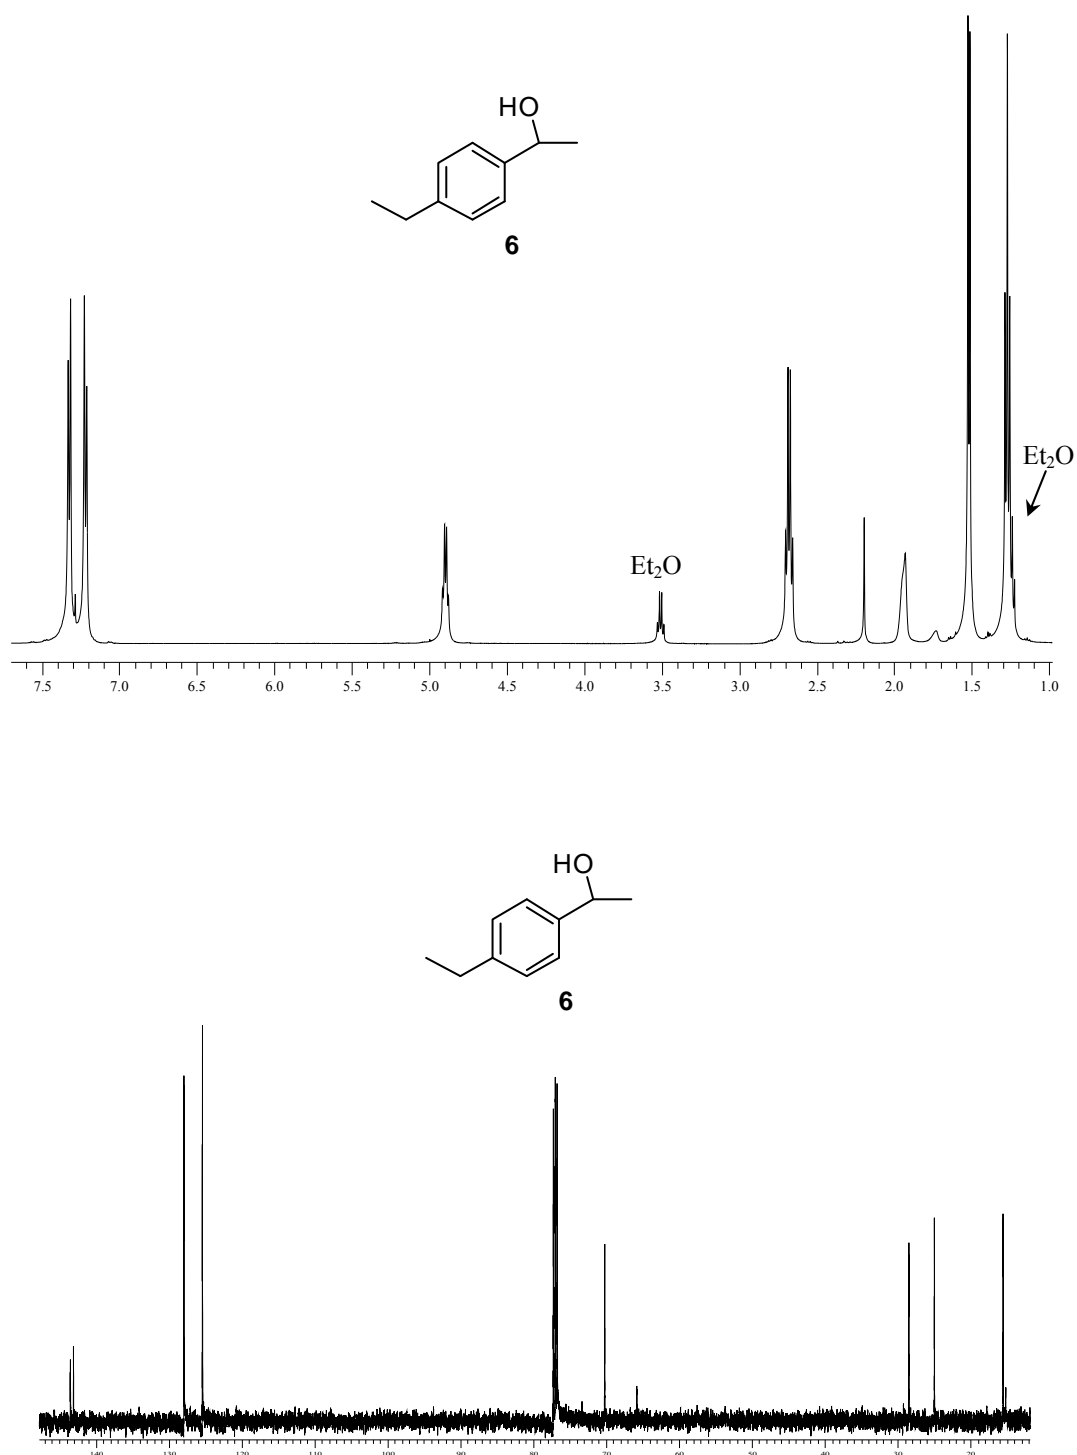

**Figure S6.**  $^1\text{H}$  NMR and  $^{13}\text{C}$  NMR of the product **6** using  $\text{CDCl}_3$  as solvent.

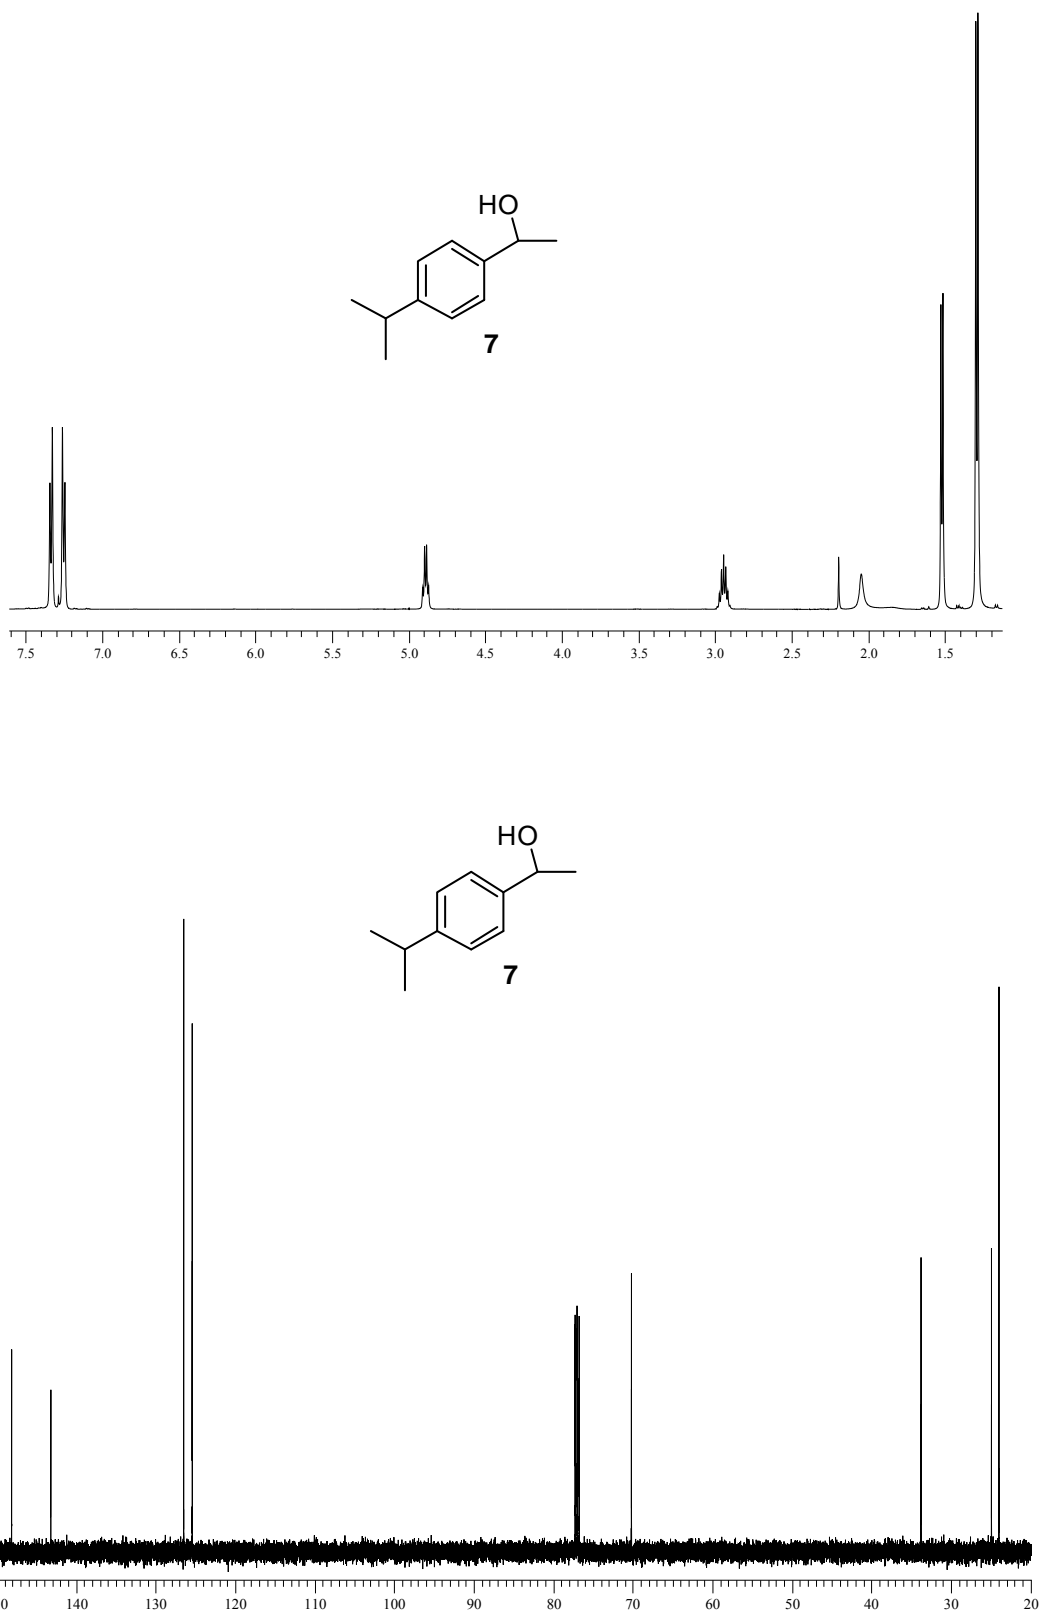

**Figure S7.**  $^1\text{H}$  NMR and  $^{13}\text{C}$  NMR of the product **7** using  $\text{CDCl}_3$  as solvent.

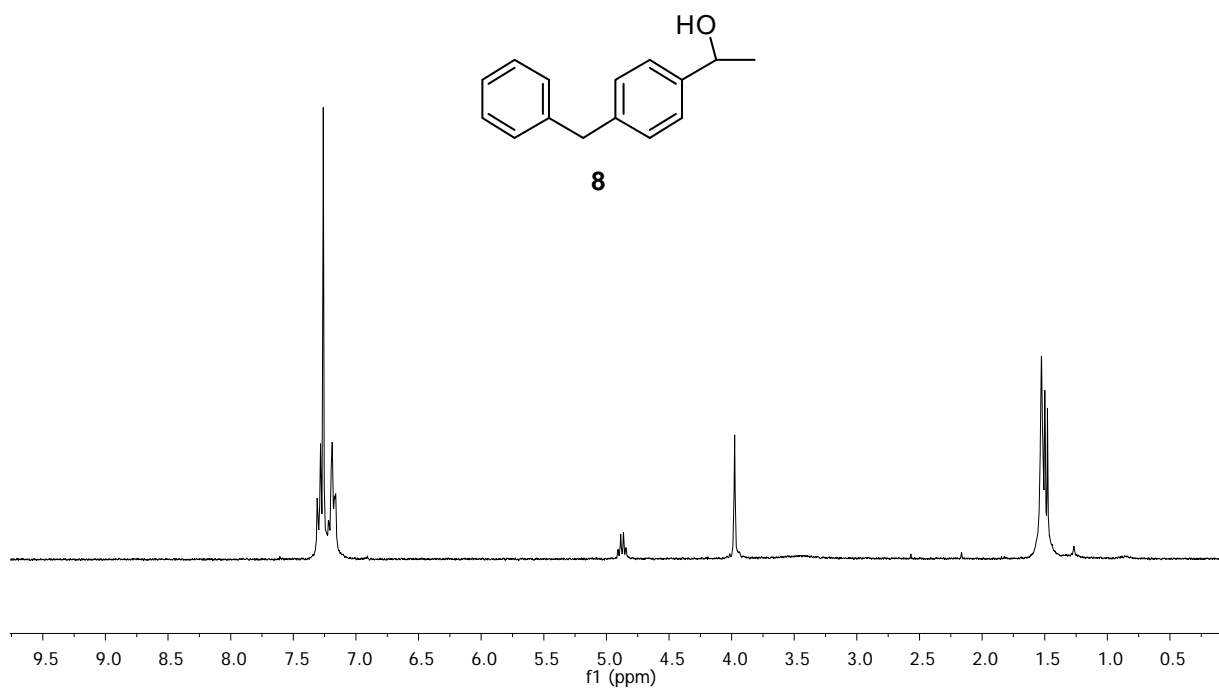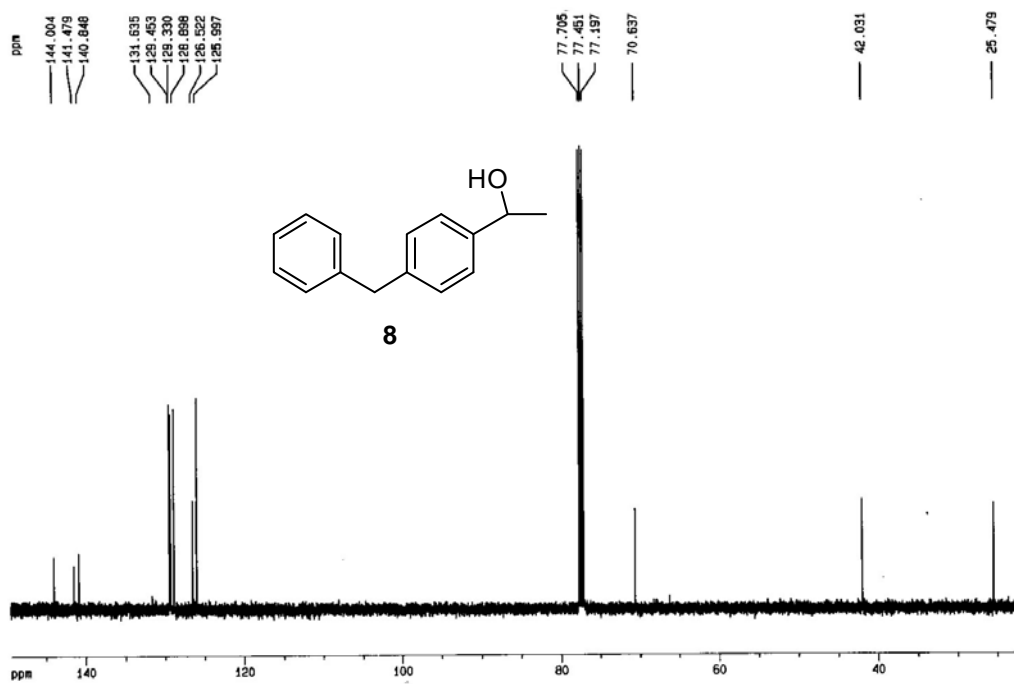

**Figure S8.**  $^1\text{H}$  NMR and  $^{13}\text{C}$  NMR of the product **8** using  $\text{CDCl}_3$  as solvent.

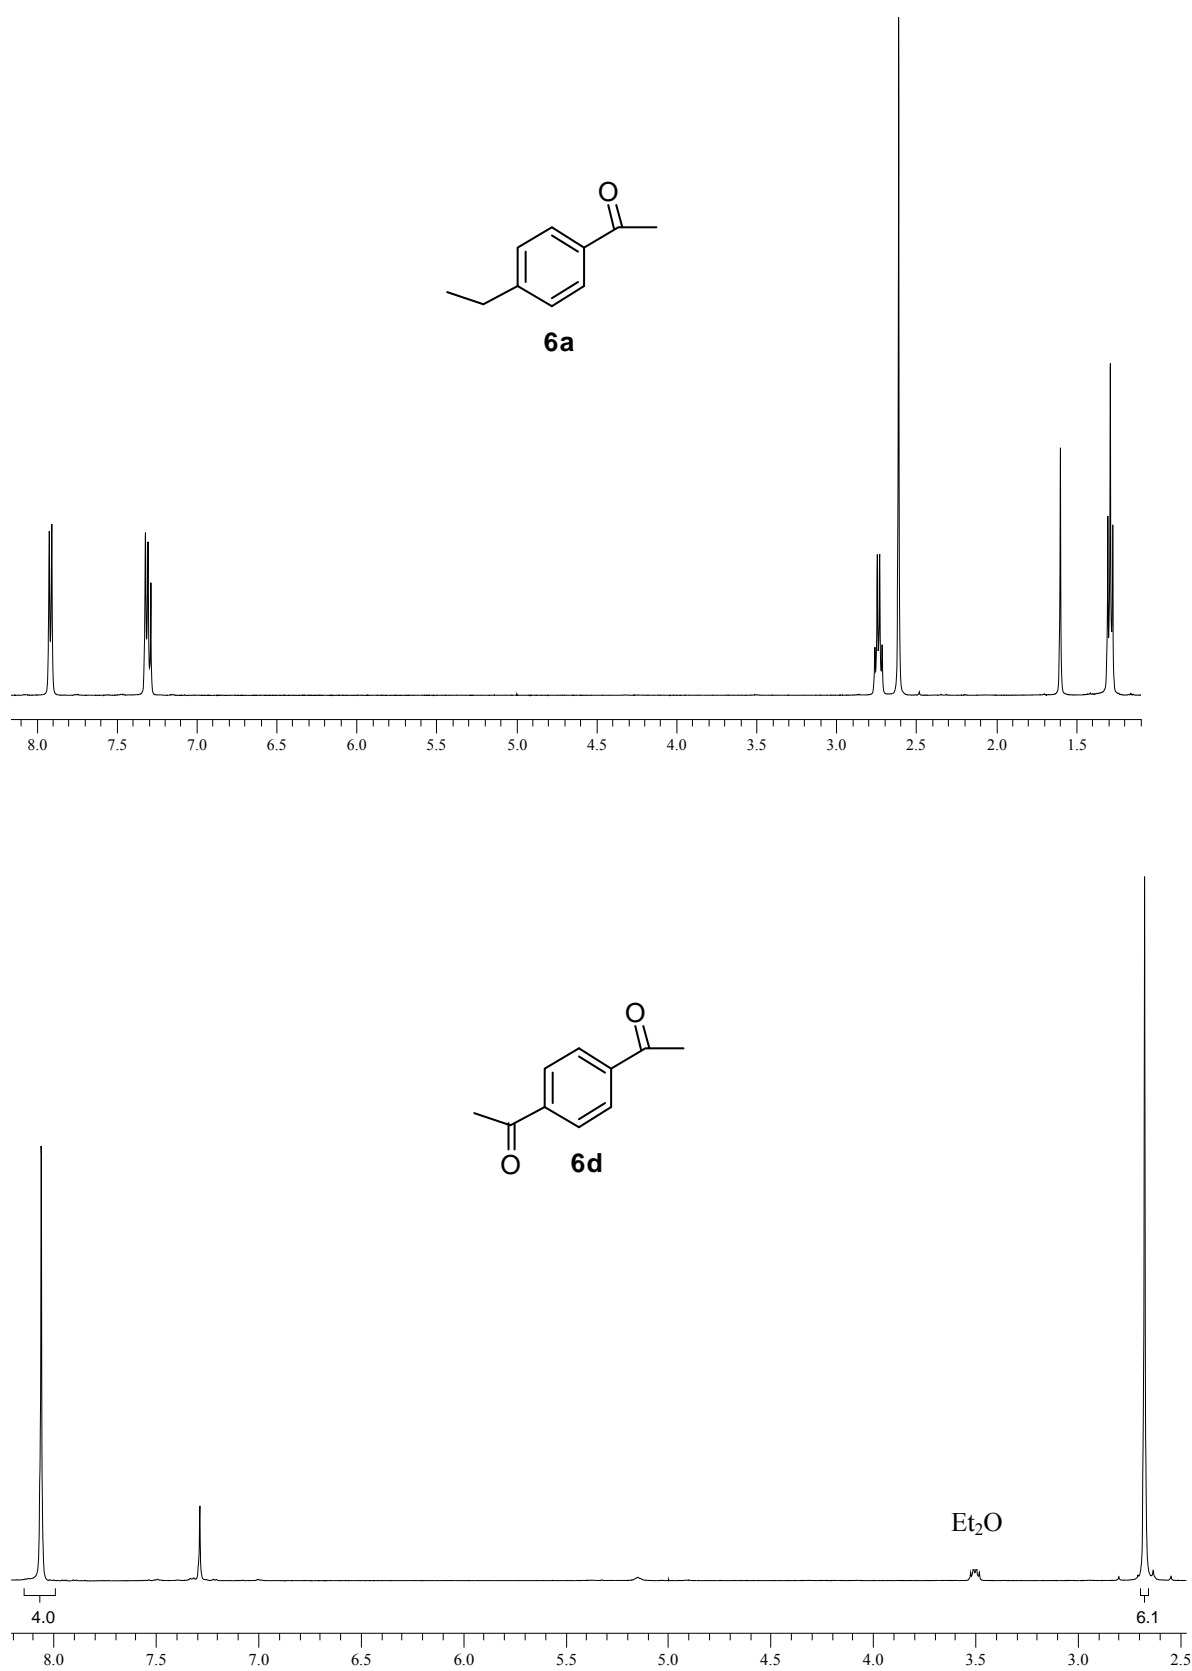

**Figure S9.**  $^1\text{H}$  NMR of the products **6a** and **6d** using  $\text{CDCl}_3$  as solvent.

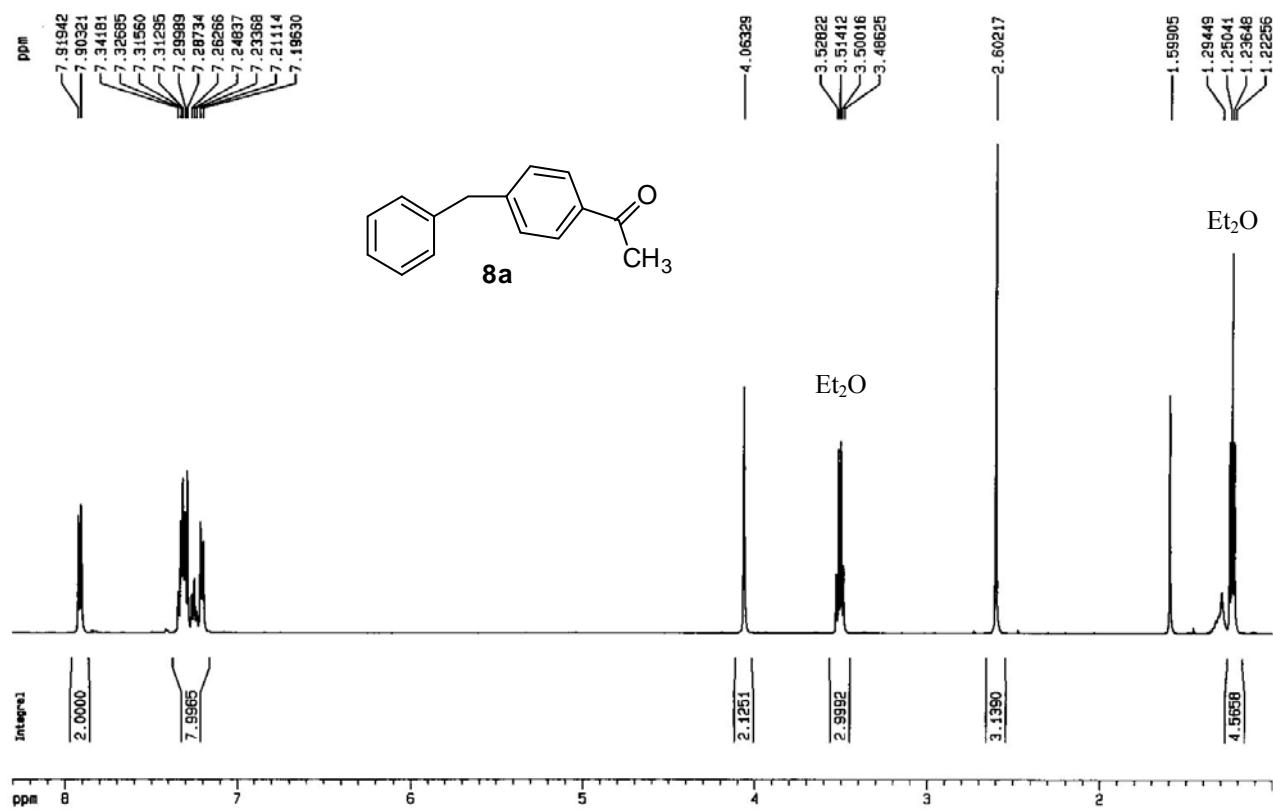

**Figure S10.** <sup>1</sup>H NMR of the product **8a** using CDCl<sub>3</sub> as solvent.



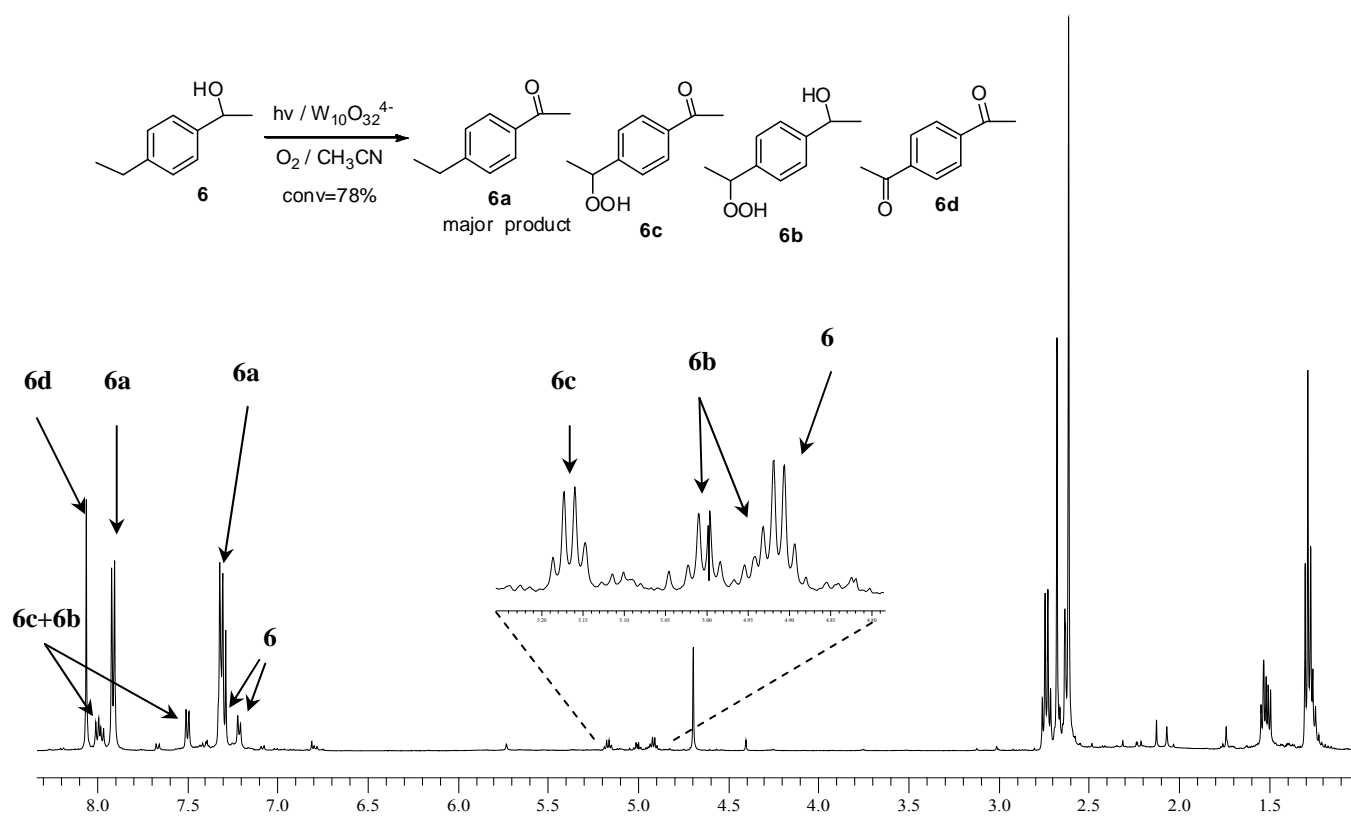

**Figure S11.** <sup>1</sup>H NMR in CDCl<sub>3</sub> of the crude mixture after photooxidation of **6** catalyzed by W<sub>10</sub>O<sub>32</sub><sup>4-</sup>.

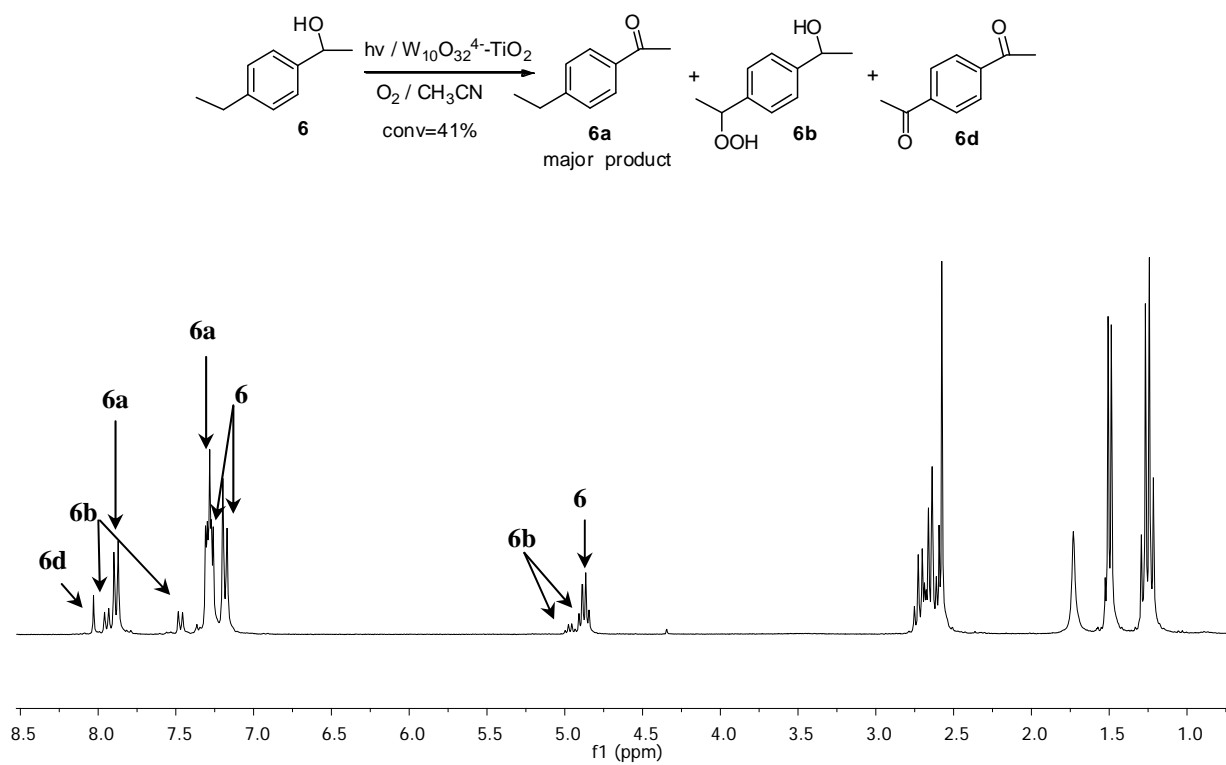

**Figure S12.**  $^1\text{H}$  NMR in  $\text{CDCl}_3$  of the crude mixture after photooxidation of **6** catalyzed by DT-MTA.

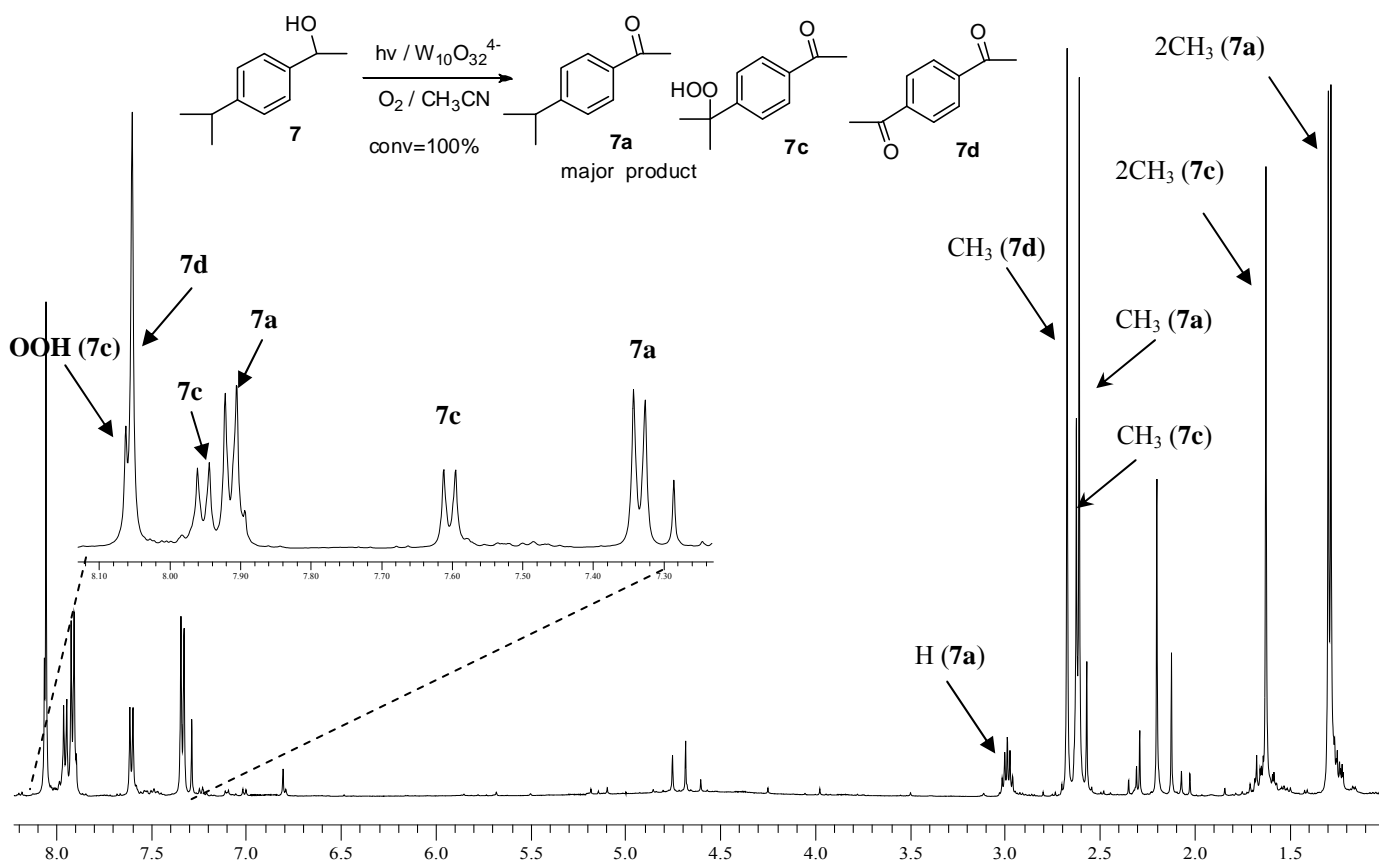

**Figure S13.**  $^1\text{H}$  NMR in  $\text{CDCl}_3$  of the crude mixture after photooxidation of **7** catalyzed by  $\text{W}_{10}\text{O}_{32}^{4-}$ .

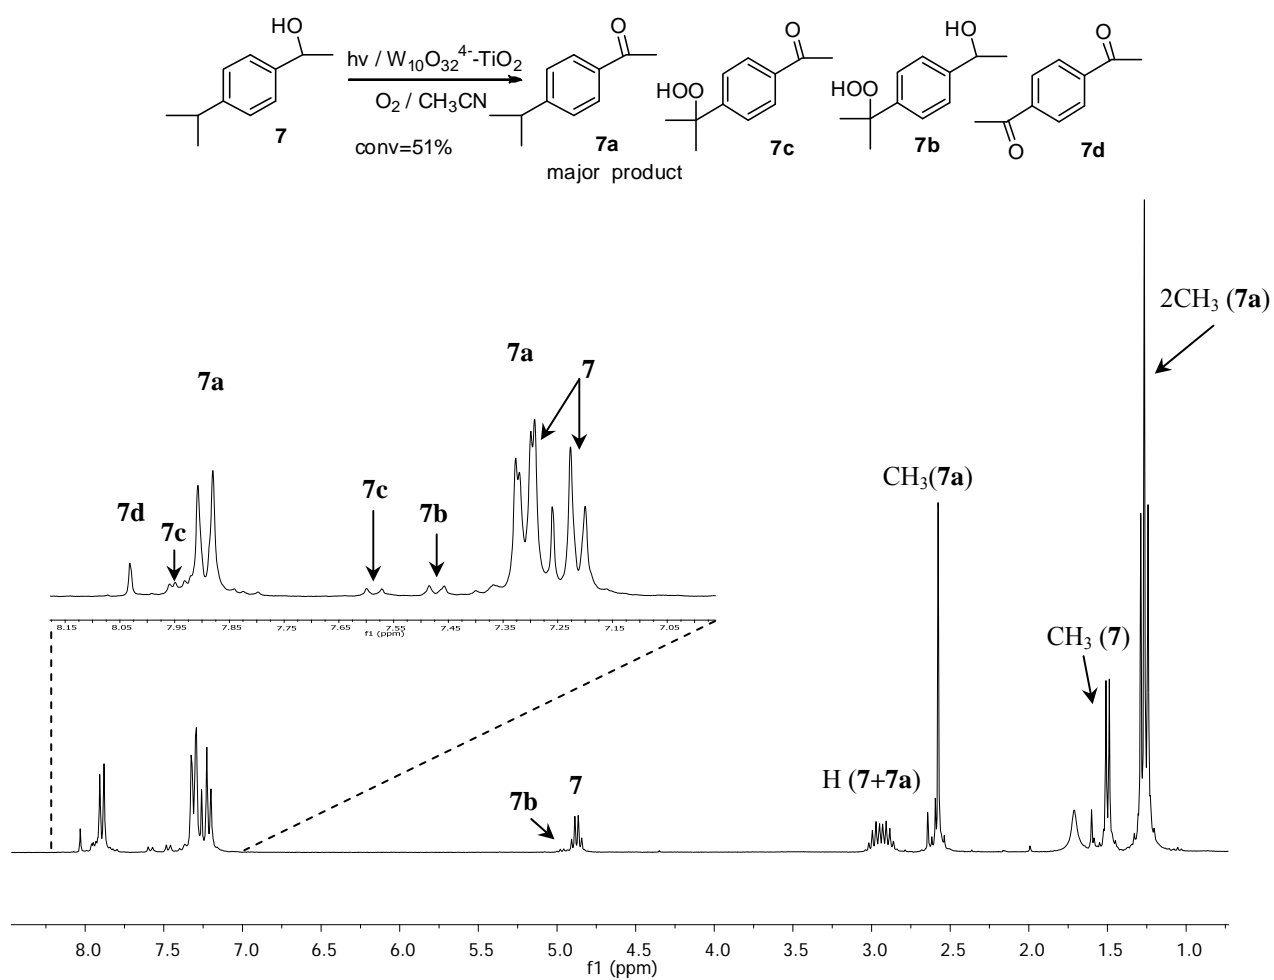

**Figure S14.**  $^1\text{H}$  NMR in  $\text{CDCl}_3$  of the crude mixture after photooxidation of **7** catalyzed by DT-MTA.

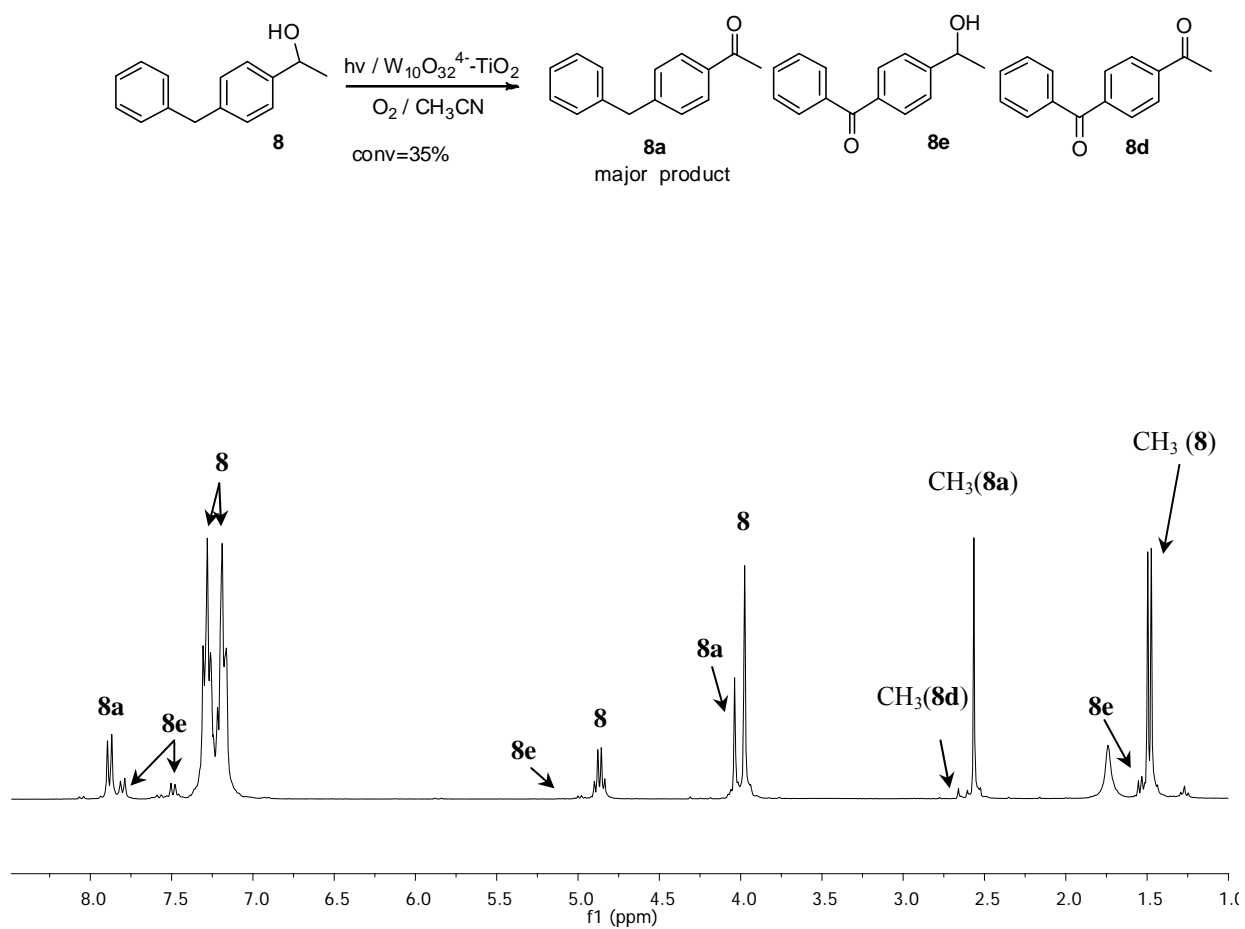

**Figure S15.** <sup>1</sup>H NMR in CDCl<sub>3</sub> of the crude mixture after photooxidation of **8** catalyzed by DT-MTA.

## GC-MS

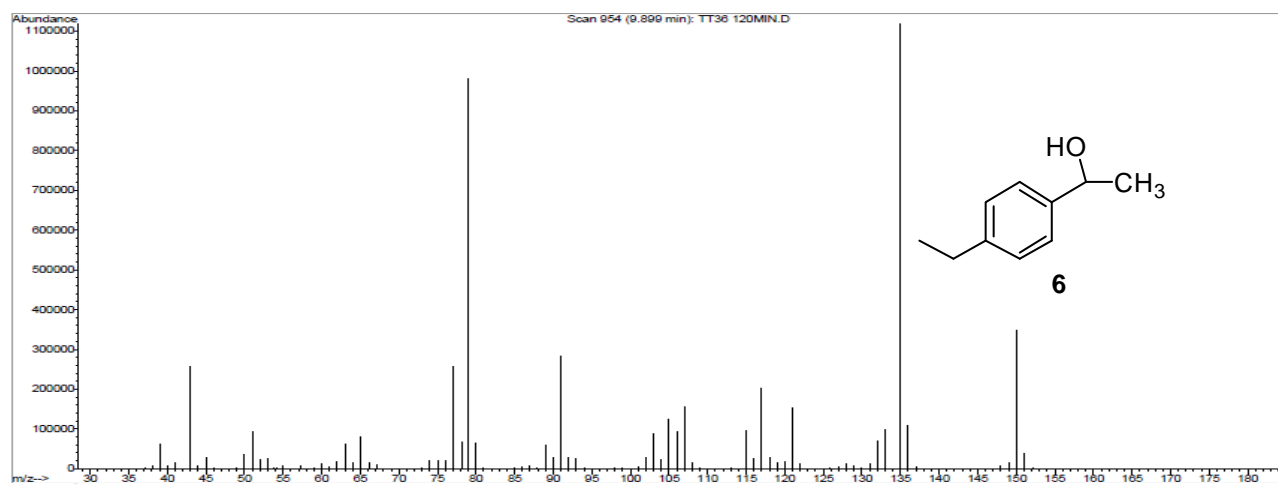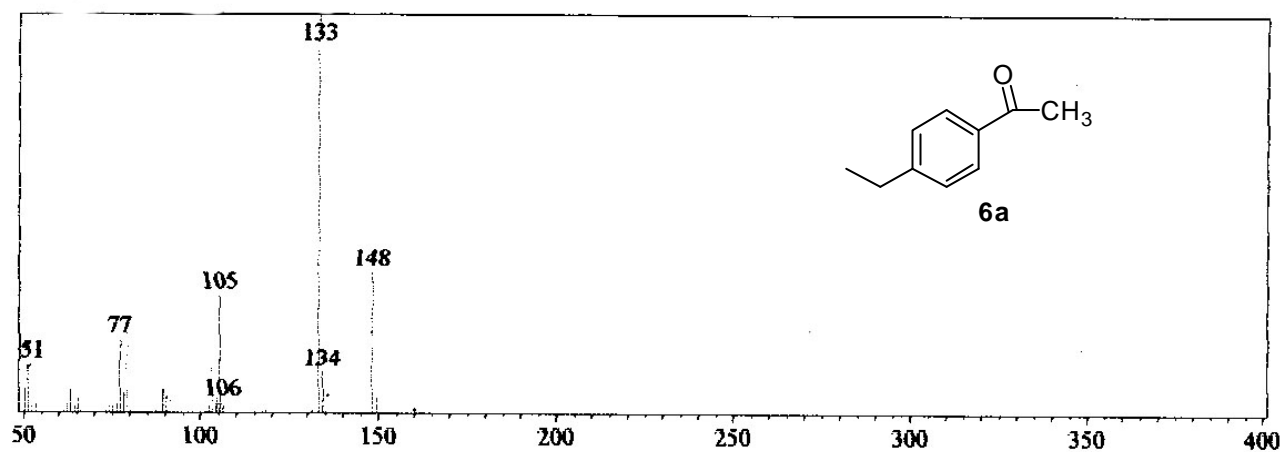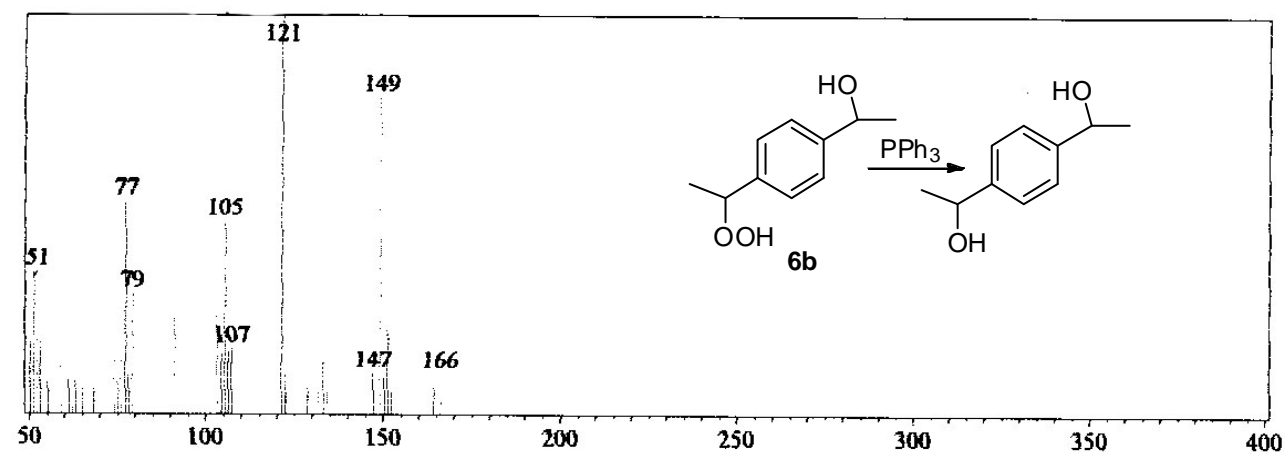

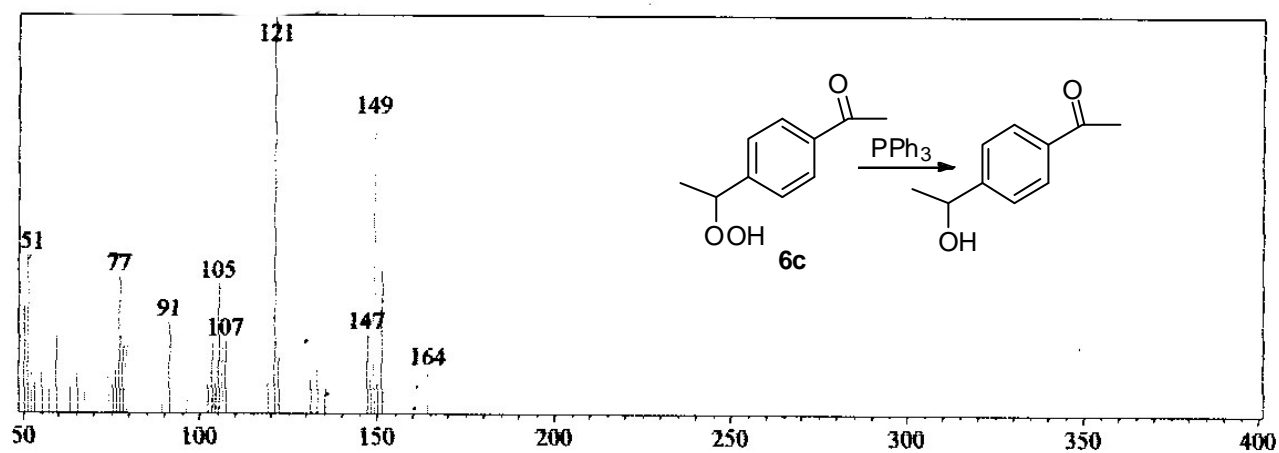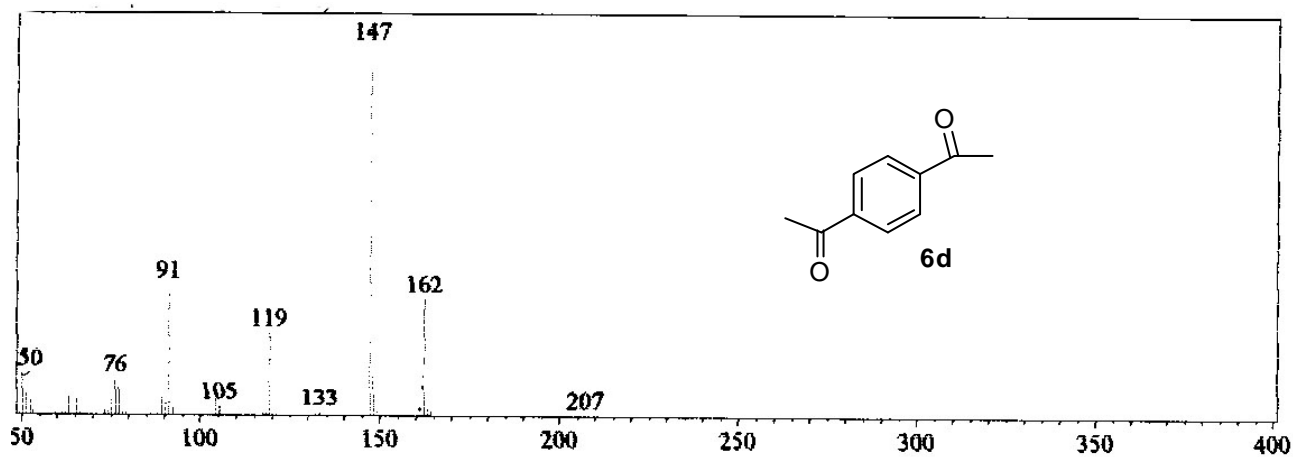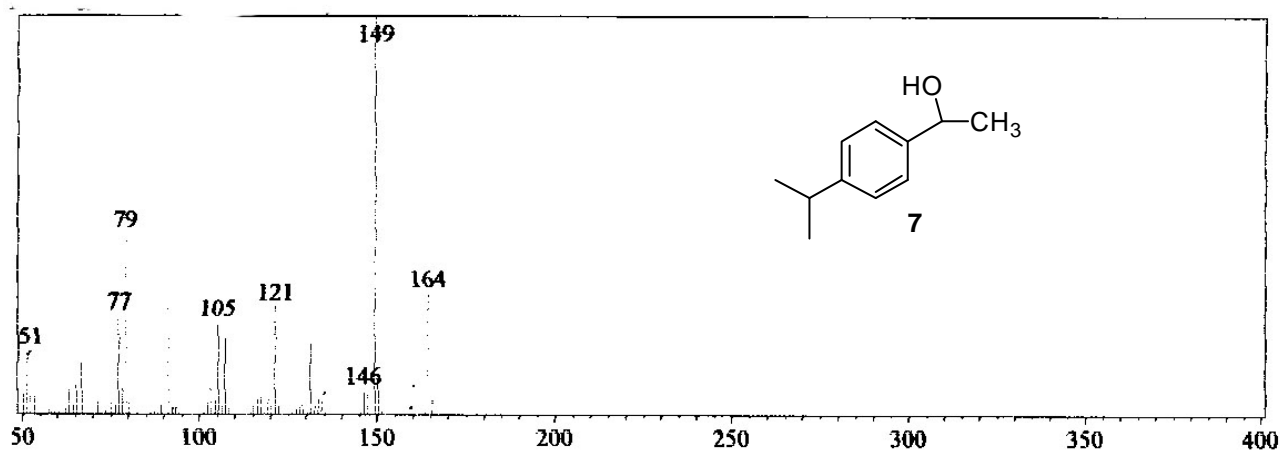

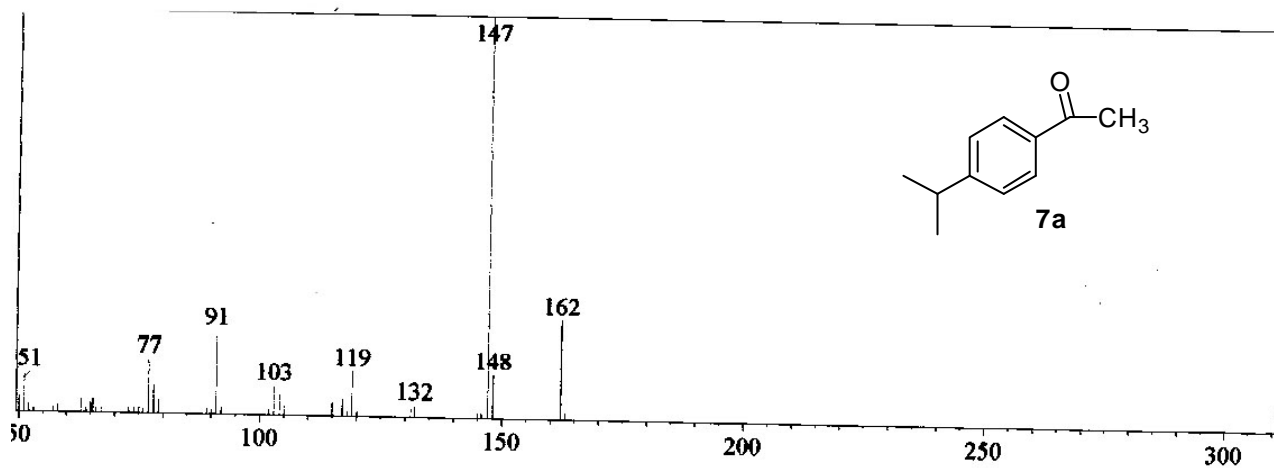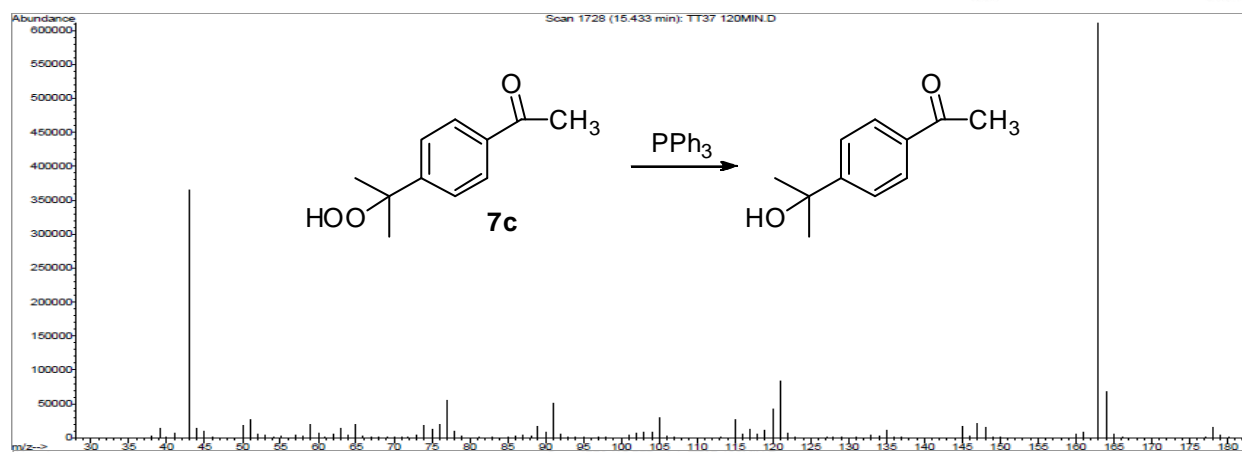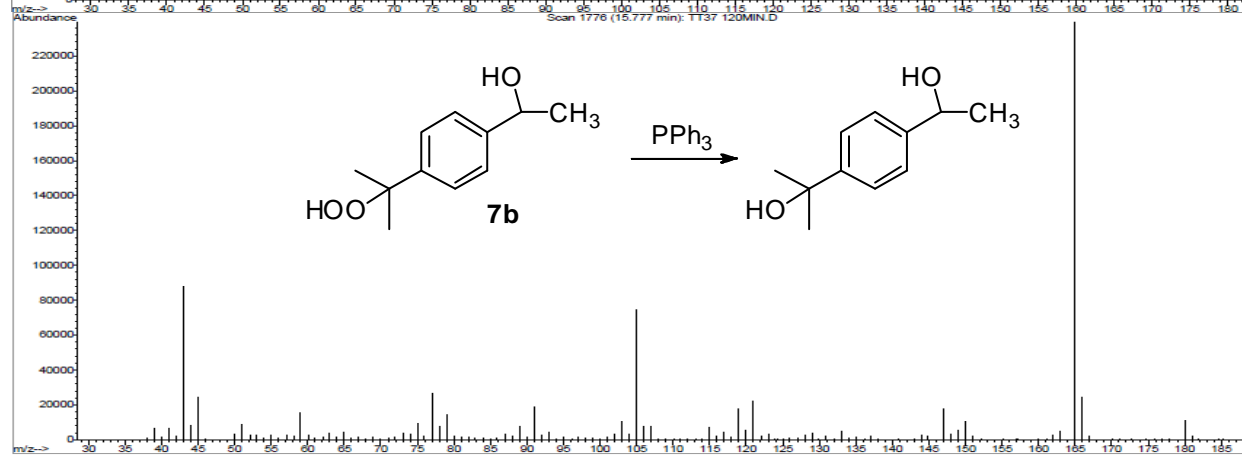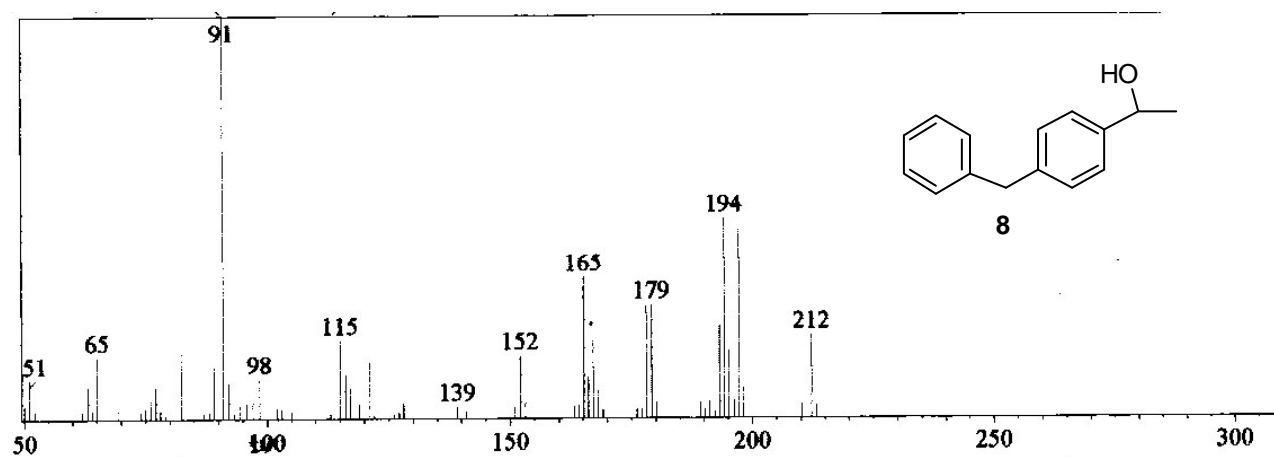



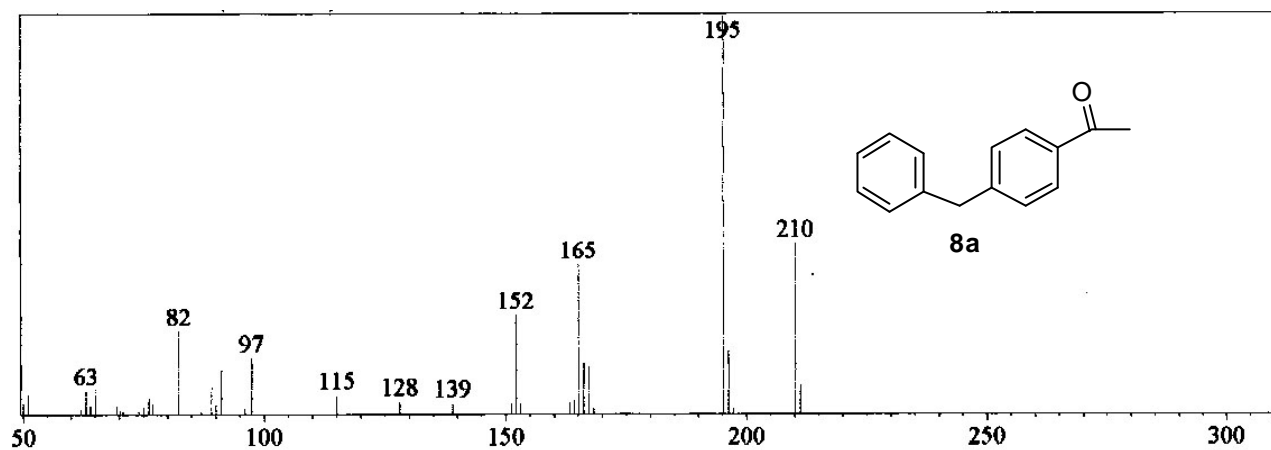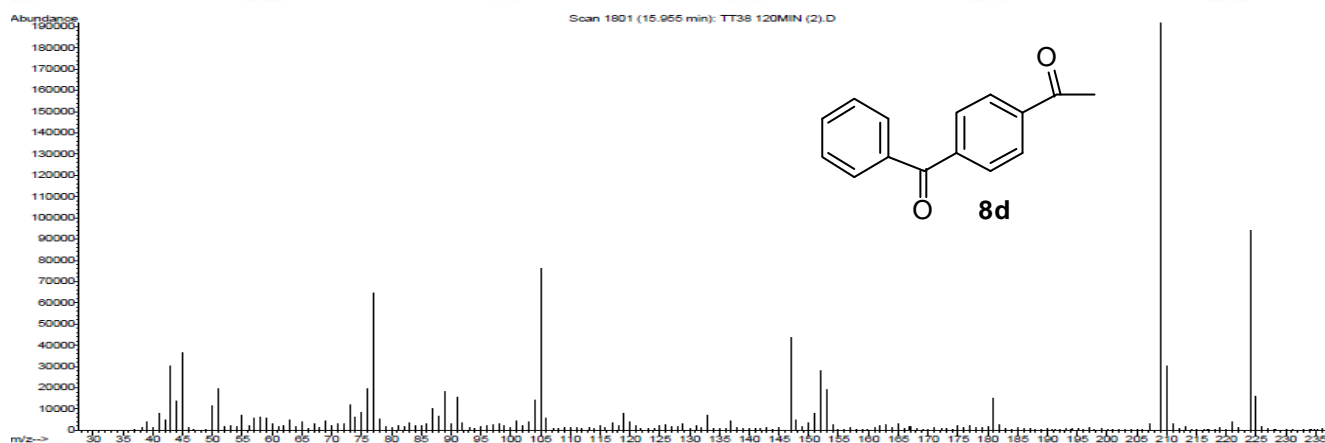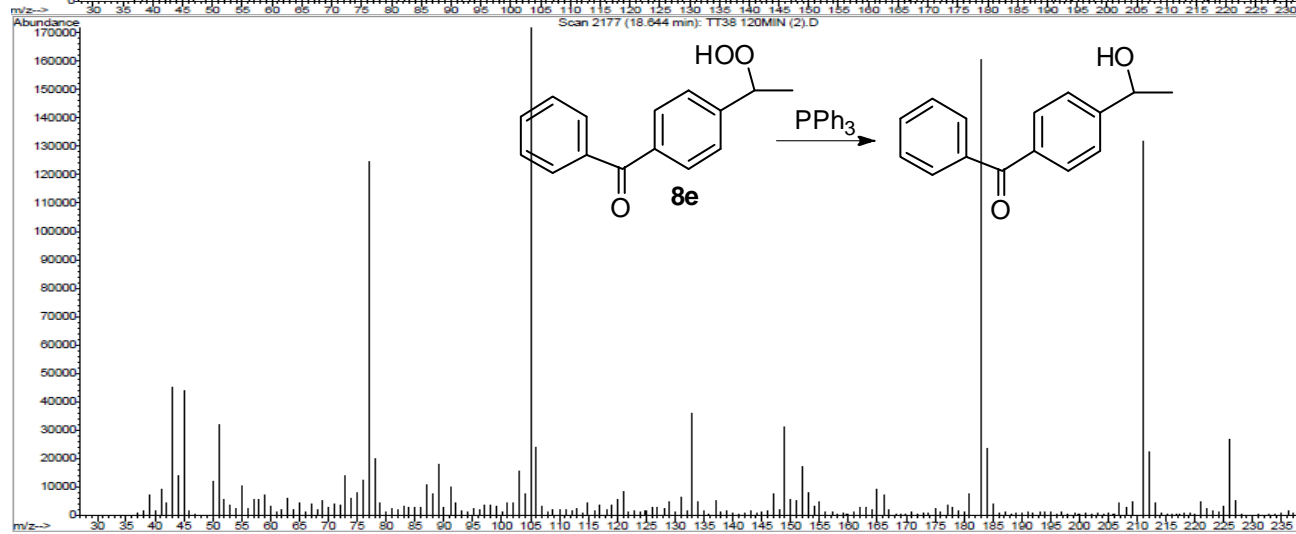

Supplement: c4pp00268g1.pdf [file c4pp00268g1.pdf]
